# Supplementary material for: A Novel Prediction Tool for Endoscopic Intervention in Patients with Acute Upper Gastro-Intestinal Bleeding
Source: MDPI journal article supplement (doi:10.3390/jcm11195893), 2022-10-05
Supplement: s1 [file s1]

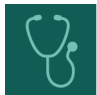

**Table S1.** Bleeding etiology among patients that underwent endoscopic therapy.

| <b>Etiology of bleeding</b>            | <b>Total<br/>N</b> |
|----------------------------------------|--------------------|
| Esophageal Varices                     | 11                 |
| Esophageal ulcer                       | 6                  |
| Mallory-Weiss Tear                     | 16                 |
| Gastric Ulcer                          | 36                 |
| Gastric Erosions                       | 10                 |
| Gastric varices                        | 5                  |
| Gastric tumor                          | 5                  |
| Gastric Polyp                          | 4                  |
| Gastric vascular malformation          | 8                  |
| Duodenal Ulcer                         | 41                 |
| Duodenal erosions                      | 2                  |
| Vascular Lesion - 2nd Part of Duodenum | 1                  |
